# Supplementary material
Source: MDPI journal article supplement (https://www.mdpi.com/2076-3271/11/3/60)
Supplement: s1 [file s1]

# Supplementary Materials 1

## Section 1: Fractional Abundance Tables

Table 1: Sensitivity and specificity for detection of cancer (1% Fr.Ab.)

| Analysis Method<br>(1% Fr.Ab.) | Status   | Cancer    |          | Total | P-Value |
|--------------------------------|----------|-----------|----------|-------|---------|
|                                |          | No Cancer | Cancer   |       |         |
|                                |          | N (%)     |          |       |         |
| Model 1a                       | Negative | 375 (91)  | 82 (67)  | 457   | <0.001  |
|                                | Positive | 39 (9)    | 41 (33)  | 80    |         |
| Model 1b                       | Negative | 397 (96)  | 100 (81) | 497   | <0.001  |
|                                | Positive | 17 (4)    | 23 (19)  | 40    |         |
| Model 2                        | Negative | 385 (93)  | 89 (72)  | 474   | <0.001  |
|                                | Positive | 29 (7)    | 34 (28)  | 63    |         |
| Model 3                        | Negative | 366 (88)  | 78 (63)  | 444   | <0.001  |
|                                | Positive | 48 (12)   | 45 (37)  | 93    |         |
| Model 4                        | Negative | 406 (98)  | 104 (85) | 510   | <0.001  |
|                                | Positive | 8 (2)     | 19 (15)  | 27    |         |
|                                | Total    | 414       | 123      | 537   |         |

*Fr.Ab, Fractional Abundance*

Table 2: Sensitivity and specificity for detection of cancer (0.5% Fr.Ab.)

| Analysis Method<br>(0.5% Fr.Ab.) | Status   | Cancer    |         | Total | P-Value |
|----------------------------------|----------|-----------|---------|-------|---------|
|                                  |          | No Cancer | Cancer  |       |         |
|                                  |          | N (%)     |         |       |         |
| Model 1a                         | Negative | 342 (83)  | 71 (58) | 413   | <0.001  |
|                                  | Positive | 72 (17)   | 52 (42) | 124   |         |
| Model 1b                         | Negative | 386 (93)  | 90 (73) | 476   | <0.001  |
|                                  | Positive | 28 (7)    | 33 (27) | 61    |         |
| Model 2                          | Negative | 359 (87)  | 74 (60) | 433   | <0.001  |
|                                  | Positive | 55 (13)   | 49 (40) | 104   |         |
| Model 3                          | Negative | 329 (79)  | 66 (54) | 395   | <0.001  |
|                                  | Positive | 85 (21)   | 57 (46) | 142   |         |
| Model 4                          | Negative | 399 (96)  | 95 (77) | 494   | <0.001  |
|                                  | Positive | 15 (4)    | 28 (23) | 43    |         |
|                                  | Total    | 414       | 123     | 537   |         |

*Fr.Ab, Fractional Abundance*

Table 3: Sensitivity and specificity for detection of cancer (0.25% Fr.Ab.)

| Analysis Method<br>(0.25% Fr.Ab.) | Status   | Cancer    |         | Total | P-Value |
|-----------------------------------|----------|-----------|---------|-------|---------|
|                                   |          | No Cancer | Cancer  |       |         |
|                                   |          | N (%)     |         |       |         |
| Model 1a                          | Negative | 297 (72)  | 56 (46) | 353   | <0.001  |
|                                   | Positive | 117 (28)  | 67 (54) | 184   |         |
| Model 1b                          | Negative | 369 (89)  | 79 (64) | 448   | <0.001  |
|                                   | Positive | 45 (11)   | 44 (36) | 89    |         |
| Model 2                           | Negative | 324 (78)  | 61 (50) | 385   | <0.001  |
|                                   | Positive | 90 (22)   | 62 (50) | 152   |         |
| Model 3                           | Negative | 271 (65)  | 46 (37) | 317   | <0.001  |
|                                   | Positive | 143 (35)  | 77 (63) | 220   |         |
| Model 4                           | Negative | 395 (95)  | 89 (72) | 484   | <0.001  |
|                                   | Positive | 19 (5)    | 34 (28) | 53    |         |
|                                   | Total    | 414       | 123     | 537   |         |

*Fr.Ab, Fractional Abundance*

Table 4: Sensitivity for detection based on stage of cancer (1% Fr.Ab.)

| Analysis Method<br>(1% Fr.Ab.) | Status   | Stage   |         |         |         |         | Total | P-Value |
|--------------------------------|----------|---------|---------|---------|---------|---------|-------|---------|
|                                |          | 0       | 1       | 2       | 3       | 4       |       |         |
|                                |          | N (%)   |         |         |         |         |       |         |
| Model 1a                       | Negative | 4 (80)  | 28 (78) | 24 (71) | 26 (58) | 0       | 82    | <0.05   |
|                                | Positive | 1 (20)  | 8 (22)  | 10 (29) | 19 (42) | 3 (100) | 41    |         |
| Model 1b                       | Negative | 5 (100) | 29 (81) | 27 (79) | 38 (84) | 1 (33)  | 100   | 0.199   |
|                                | Positive | 0       | 7 (19)  | 7 (21)  | 7 (16)  | 2 (67)  | 23    |         |
| Model 2                        | Negative | 4 (80)  | 27 (75) | 26 (77) | 32 (71) | 0       | 89    | 0.076   |
|                                | Positive | 1 (20)  | 9 (25)  | 8 (23)  | 13 (29) | 3 (100) | 34    |         |
| Model 3                        | Negative | 4 (80)  | 24 (67) | 24 (71) | 26 (58) | 0       | 78    | 0.115   |
|                                | Positive | 1 (20)  | 12 (33) | 10 (29) | 19 (42) | 3 (100) | 45    |         |
| Model 4                        | Negative | 5 (100) | 33 (92) | 27 (79) | 38 (84) | 1 (33)  |       | 0.067   |
|                                | Positive | 0       | 3 (8)   | 7 (21)  | 7 (16)  | 2 (67)  |       |         |
|                                | Total    | 5       | 36      | 34      | 45      | 3       | 123   |         |

*Fr.Ab, Fractional Abundance*

Table 5: Sensitivity for detection based on stage of cancer (Fr.Ab. 0.5%)

| Analysis Method<br>(0.5% Fr.Ab.) | Status   | Stage  |         |         |         |         | Total | P-Value |
|----------------------------------|----------|--------|---------|---------|---------|---------|-------|---------|
|                                  |          | 0      | 1       | 2       | 3       | 4       |       |         |
|                                  |          | N (%)  |         |         |         |         |       |         |
| Model 1a                         | Negative | 2 (40) | 24 (67) | 23 (68) | 22 (49) | 0       | 71    | 0.06    |
|                                  | Positive | 3 (60) | 12 (33) | 11 (32) | 23 (51) | 3 (100) | 52    |         |
| Model 1b                         | Negative | 4 (80) | 26 (72) | 26 (77) | 34 (76) | 0       | 90    | 0.071   |
|                                  | Positive | 1 (20) | 10 (28) | 8 (23)  | 11 (24) | 3 (100) | 33    |         |
| Model 2                          | Negative | 3 (60) | 24 (67) | 24 (71) | 23 (51) | 0       | 74    | 0.075   |
|                                  | Positive | 2 (40) | 12 (33) | 10 (29) | 22 (49) | 3 (100) | 49    |         |
| Model 3                          | Negative | 2 (40) | 21 (58) | 22 (65) | 21 (47) | 0       | 66    | 0.15    |
|                                  | Positive | 3 (60) | 15 (42) | 12 (35) | 24 (53) | 3 (100) | 57    |         |
| Model 4                          | Negative | 4 (80) | 29 (81) | 27 (79) | 35 (78) | 0       | 95    | 0.036   |
|                                  | Positive | 1 (20) | 7 (19)  | 7 (21)  | 10 (22) | 3 (100) | 28    |         |
|                                  | Total    | 5      | 36      | 34      | 45      | 3       | 123   |         |

*Fr.Ab, Fractional Abundance*

Table 6: Sensitivity for detection based on stage of cancer (Fr.Ab. 0.25%)

| Analysis Method<br>(0.25% Fr.Ab.) | Status   | Stage  |         |         |         |         | Total | P-Value |
|-----------------------------------|----------|--------|---------|---------|---------|---------|-------|---------|
|                                   |          | 0      | 1       | 2       | 3       | 4       |       |         |
|                                   |          | N (%)  |         |         |         |         |       |         |
| Model 1a                          | Negative | 1 (20) | 19 (53) | 21 (62) | 15 (33) | 0       | 56    | 0.021   |
|                                   | Positive | 4 (80) | 17 (47) | 13 (38) | 30 (67) | 3 (100) | 67    |         |
| Model 1b                          | Negative | 4 (80) | 22 (61) | 24 (71) | 29 (64) | 0       | 79    | 0.15    |
|                                   | Positive | 1 (20) | 14 (39) | 10 (29) | 16 (36) | 3 (100) | 44    |         |
| Model 2                           | Negative | 2 (40) | 19 (53) | 22 (65) | 18 (40) | 0       | 61    | 0.082   |
|                                   | Positive | 3 (60) | 17 (47) | 12 (35) | 27 (60) | 3 (100) | 62    |         |
| Model 3                           | Negative | 1 (20) | 14 (39) | 18 (53) | 13 (29) | 0       | 46    | 0.109   |
|                                   | Positive | 4 (80) | 22 (61) | 16 (47) | 32 (71) | 3 (100) | 77    |         |
| Model 4                           | Negative | 4 (80) | 27 (75) | 27 (79) | 31 (69) | 0       | 89    | 0.055   |
|                                   | Positive | 1 (20) | 9 (25)  | 7 (21)  | 14 (31) | 3 (100) | 34    |         |
|                                   | Total    | 5      | 36      | 34      | 45      | 3       | 123   |         |

*Fr.Ab, Fractional Abundance*

Table 7: Sensitivity for detection based on principle diagnosis (1% Fr.Ab.)

| Analysis Method<br>(1% Fr.Ab.) | Status   | Principle Diagnosis |          |          |             |          | Total | P-Value |
|--------------------------------|----------|---------------------|----------|----------|-------------|----------|-------|---------|
|                                |          | Cancer              | AA       | NAA      | IBD/Colitis | NED      |       |         |
|                                |          | N (%)               |          |          |             |          |       |         |
| Model 1a                       | Negative | 82 (67)             | 128 (93) | 102 (90) | 7 (87)      | 138 (88) | 457   | <0.001  |
|                                | Positive | 41 (33)             | 9 (7)    | 11 (10)  | 1 (13)      | 18 (12)  | 80    |         |
| Model 1b                       | Negative | 100 (81)            | 128 (93) | 109 (96) | 8 (100)     | 152 (97) | 497   | <0.001  |
|                                | Positive | 23 (19)             | 9 (7)    | 4 (4)    | 0           | 4 (3)    | 40    |         |
| Model 2                        | Negative | 89 (72)             | 125 (91) | 107 (95) | 8 (100)     | 145 (93) | 474   | <0.001  |
|                                | Positive | 34 (28)             | 12 (9)   | 6 (5)    | 0           | 11 (7)   | 63    |         |
| Model 3                        | Negative | 78 (63)             | 123 (90) | 101 (89) | 7 (87)      | 135 (86) | 444   | <0.001  |
|                                | Positive | 45 (37)             | 14 (10)  | 12 (11)  | 1 (13)      | 21 (14)  | 93    |         |
| Model 4                        | Negative | 104 (85)            | 133 (97) | 110 (97) | 8 (100)     | 155 (99) | 510   | <0.001  |
|                                | Positive | 19 (15)             | 4 (3)    | 3 (3)    | 0           | 1 (1)    | 27    |         |
|                                | Total    | 123                 | 137      | 113      | 8           | 156      | 537   |         |

Fr.Ab, Fractional Abundance; AA, advanced adenoma; NAA, non-advanced adenoma; IBD, inflammatory bowel disease; Colitis, non-IBD related colitis causes; NED, no evidence of disease; <sup>a</sup>includes hyperplastic polyps, diverticulosis, angiodysplasia and haemorrhoids but excludes cancer, adenomas and inflammation of any kind.

Table 8: Sensitivity for detection based on principle diagnosis (0.5% Fr.Ab.)

| Analysis Method<br>(0.5% Fr.Ab.) | Status   | Principle Diagnosis |          |          |             |          | Total | P-Value |
|----------------------------------|----------|---------------------|----------|----------|-------------|----------|-------|---------|
|                                  |          | Cancer              | AA       | NAA      | IBD/Colitis | NED      |       |         |
|                                  |          | N (%)               |          |          |             |          |       |         |
| Model 1a                         | Negative | 71 (58)             | 112 (82) | 97 (86)  | 7 (87)      | 126 (81) | 413   | <0.001  |
|                                  | Positive | 52 (42)             | 25 (18)  | 16 (14)  | 1(13)       | 30 (19)  | 124   |         |
| Model 1b                         | Negative | 90 (73)             | 123 (90) | 108 (96) | 8 (100)     | 147 (94) | 476   | <0.001  |
|                                  | Positive | 33 (27)             | 14 (10)  | 5 (4)    | 0           | 9 (6)    | 61    |         |
| Model 2                          | Negative | 74 (60)             | 121 (88) | 99 (88)  | 7 (87)      | 132 (85) | 433   | <0.001  |
|                                  | Positive | 49 (40)             | 16 (12)  | 14 (12)  | 1(13)       | 24 (15)  | 104   |         |
| Model 3                          | Negative | 66 (54)             | 104 (76) | 96 (85)  | 7 (87)      | 122 (78) | 395   | <0.001  |
|                                  | Positive | 57 (46)             | 33 (24)  | 17 (15)  | 1(13)       | 34 (22)  | 142   |         |
| Model 4                          | Negative | 95 (77)             | 131 (96) | 109 (96) | 8 (100)     | 151 (97) | 494   | <0.001  |
|                                  | Positive | 28 (23)             | 6 (4)    | 4 (4)    | 0           | 5 (3)    | 43    |         |
|                                  | Total    | 123                 | 137      | 113      | 8           | 156      | 537   |         |

Fr.Ab, Fractional Abundance; AA, advanced adenoma; NAA, non-advanced adenoma; IBD, inflammatory bowel disease; Colitis, non-IBD related colitis causes; NED, no evidence of disease; <sup>a</sup>includes hyperplastic polyps, diverticulosis, angiodysplasia and haemorrhoids but excludes cancer, adenomas and inflammation of any kind.



Table 9: Sensitivity for detection based on principle diagnosis (0.25% Fr.Ab.)

| Analysis Method<br>(0.25% Fr.Ab.) | Status   | Principle Diagnosis |          |          |             |          | Total | P-Value |
|-----------------------------------|----------|---------------------|----------|----------|-------------|----------|-------|---------|
|                                   |          | Cancer              | AA       | NAA      | IBD/Colitis | NED      |       |         |
|                                   |          | N (%)               |          |          |             |          |       |         |
| Model 1a                          | Negative | 56 (46)             | 96 (70)  | 82 (73)  | 6 (75)      | 113 (72) | 353   | <0.001  |
|                                   | Positive | 67 (55)             | 41 (30)  | 31 (27)  | 2 (25)      | 43 (28)  | 184   |         |
| Model 1b                          | Negative | 79 (64)             | 115 (84) | 103 (91) | 8 (100)     | 143 (92) | 448   | <0.001  |
|                                   | Positive | 44 (36)             | 22 (16)  | 10 (9)   | 0           | 13 (8)   | 89    |         |
| Model 2                           | Negative | 61 (50)             | 103 (75) | 95 (84)  | 7 (87)      | 119 (76) | 385   | <0.001  |
|                                   | Positive | 62 (50)             | 34 (25)  | 18 (16)  | 1 (13)      | 37 (24)  | 152   |         |
| Model 3                           | Negative | 46 (37)             | 81 (59)  | 77 (68)  | 6 (75)      | 107 (69) | 317   | <0.001  |
|                                   | Positive | 77 (63)             | 56 (41)  | 36 (32)  | 2 (25)      | 49 (31)  | 220   |         |
| Model 4                           | Negative | 89 (72)             | 130 (95) | 108 (96) | 8 (100)     | 149 (95) | 484   | <0.001  |
|                                   | Positive | 34 (28)             | 7 (5)    | 5 (4)    | 0           | 7 (5)    | 53    |         |
|                                   | Total    | 123                 | 137      | 113      | 8           | 156      | 537   |         |

Fr.Ab, Fractional Abundance; AA, advanced adenoma; NAA, non-advanced adenoma; IBD, inflammatory bowel disease; Colitis, non-IBD related colitis causes; NED, no evidence of disease; <sup>a</sup>includes hyperplastic polyps, diverticulosis, angiodysplasia and haemorrhoids but excludes cancer, adenomas and inflammation of any kind.

## Section 2: Cancer specific confounding variables

T-Stage \* SDC\_NPY\_LOD\_D1

**Crosstab**

|         |                  |                  | SDC_NPY_LOD_D1 |          |        |
|---------|------------------|------------------|----------------|----------|--------|
|         |                  |                  | Negative       | Positive | Total  |
| T_Stage | 1                | Count            | 5              | 0        | 5      |
|         |                  | % within T_Stage | 100.0%         | 0.0%     | 100.0% |
|         | 2                | Count            | 5              | 5        | 10     |
|         |                  | % within T_Stage | 50.0%          | 50.0%    | 100.0% |
|         | 3                | Count            | 23             | 10       | 33     |
|         |                  | % within T_Stage | 69.7%          | 30.3%    | 100.0% |
|         | 4                | Count            | 37             | 24       | 61     |
|         |                  | % within T_Stage | 60.7%          | 39.3%    | 100.0% |
|         | 5                | Count            | 8              | 6        | 14     |
|         |                  | % within T_Stage | 57.1%          | 42.9%    | 100.0% |
| Total   | Count            | 78               | 45             | 123      |        |
|         | % within T_Stage | 63.4%            | 36.6%          | 100.0%   |        |

**Directional Measures**

|                    |                         |                          | Value | Asymptotic Standard Error <sup>a</sup> | Approximate T  | Approximate Significance | Exact Significance |
|--------------------|-------------------------|--------------------------|-------|----------------------------------------|----------------|--------------------------|--------------------|
| Nominal by Nominal | Lambda                  | Symmetric                | .000  | .000                                   | . <sup>b</sup> | . <sup>b</sup>           |                    |
|                    |                         | T_Stage Dependent        | .000  | .000                                   | . <sup>b</sup> | . <sup>b</sup>           |                    |
|                    |                         | SDC_NPY_LOD_D1 Dependent | .000  | .000                                   | . <sup>b</sup> | . <sup>b</sup>           |                    |
|                    | Goodman and Kruskal tau | T_Stage Dependent        | .006  | .007                                   |                | .601 <sup>c</sup>        | .547               |
|                    |                         | SDC_NPY_LOD_D1 Dependent | .038  | .021                                   |                | .328 <sup>c</sup>        | .339               |
|                    |                         |                          |       |                                        |                |                          |                    |

a. Not assuming the null hypothesis.

b. Cannot be computed because the asymptotic standard error equals zero.

c. Based on chi-square approximation

T-Stage \* IKZF\_SEPT9\_LOD\_D1

**Crosstab**

|         |                  |                  | IKZF_SEPT9_LOD_D1 |          |        |
|---------|------------------|------------------|-------------------|----------|--------|
|         |                  |                  | Negative          | Positive | Total  |
| T_Stage | 1                | Count            | 4                 | 1        | 5      |
|         |                  | % within T_Stage | 80.0%             | 20.0%    | 100.0% |
|         | 2                | Count            | 6                 | 4        | 10     |
|         |                  | % within T_Stage | 60.0%             | 40.0%    | 100.0% |
|         | 3                | Count            | 19                | 14       | 33     |
|         |                  | % within T_Stage | 57.6%             | 42.4%    | 100.0% |
|         | 4                | Count            | 35                | 26       | 61     |
|         |                  | % within T_Stage | 57.4%             | 42.6%    | 100.0% |
|         | 5                | Count            | 8                 | 6        | 14     |
|         |                  | % within T_Stage | 57.1%             | 42.9%    | 100.0% |
| Total   | Count            | 72               | 51                | 123      |        |
|         | % within T_Stage | 58.5%            | 41.5%             | 100.0%   |        |

**Directional Measures**

|                    |                         |                             | Value | Asymptotic Standard Error <sup>a</sup> | Approximate T  | Approximate Significance | Exact Significance |
|--------------------|-------------------------|-----------------------------|-------|----------------------------------------|----------------|--------------------------|--------------------|
| Nominal by Nominal | Lambda                  | Symmetric                   | .000  | .000                                   | . <sup>b</sup> | . <sup>b</sup>           |                    |
|                    |                         | T_Stage Dependent           | .000  | .000                                   | . <sup>b</sup> | . <sup>b</sup>           |                    |
|                    |                         | IKZF_SEPT9_LOD_D1 Dependent | .000  | .000                                   | . <sup>b</sup> | . <sup>b</sup>           |                    |
|                    | Goodman and Kruskal tau | T_Stage Dependent           | .001  | .002                                   |                | .985 <sup>c</sup>        | .979               |
|                    |                         | IKZF_SEPT9_LOD_D1 Dependent | .008  | .014                                   |                | .909 <sup>c</sup>        | .920               |
|                    |                         |                             |       |                                        |                |                          |                    |

a. Not assuming the null hypothesis.

b. Cannot be computed because the asymptotic standard error equals zero.

c. Based on chi-square approximation

# T-Stage \* MERGED\_LOD\_D1

## Crosstab

|         |                  |                  | MERGED_LOD_D1 |          |        |
|---------|------------------|------------------|---------------|----------|--------|
|         |                  |                  | Negative      | Positive | Total  |
| T_Stage | 1                | Count            | 5             | 0        | 5      |
|         |                  | % within T_Stage | 100.0%        | 0.0%     | 100.0% |
|         | 2                | Count            | 5             | 5        | 10     |
|         |                  | % within T_Stage | 50.0%         | 50.0%    | 100.0% |
|         | 3                | Count            | 19            | 14       | 33     |
|         |                  | % within T_Stage | 57.6%         | 42.4%    | 100.0% |
|         | 4                | Count            | 32            | 29       | 61     |
|         |                  | % within T_Stage | 52.5%         | 47.5%    | 100.0% |
|         | 5                | Count            | 8             | 6        | 14     |
|         |                  | % within T_Stage | 57.1%         | 42.9%    | 100.0% |
| Total   | Count            | 69               | 54            | 123      |        |
|         | % within T_Stage | 56.1%            | 43.9%         | 100.0%   |        |

## Directional Measures

|                    |                         |                         | Value | Asymptotic Standard Error <sup>a</sup> | Approximate T  | Approximate Significance | Exact Significance |
|--------------------|-------------------------|-------------------------|-------|----------------------------------------|----------------|--------------------------|--------------------|
| Nominal by Nominal | Lambda                  | Symmetric               | .000  | .000                                   | . <sup>b</sup> | . <sup>b</sup>           |                    |
|                    |                         | T_Stage Dependent       | .000  | .000                                   | . <sup>b</sup> | . <sup>b</sup>           |                    |
|                    |                         | MERGED_LOD_D1 Dependent | .000  | .000                                   | . <sup>b</sup> | . <sup>b</sup>           |                    |
|                    | Goodman and Kruskal tau | T_Stage Dependent       | .004  | .006                                   |                | .725 <sup>c</sup>        | .669               |
|                    |                         | MERGED_LOD_D1 Dependent | .036  | .011                                   |                | .356 <sup>c</sup>        | .360               |
|                    |                         |                         |       |                                        |                |                          |                    |

a. Not assuming the null hypothesis.

b. Cannot be computed because the asymptotic standard error equals zero.

c. Based on chi-square approximation

# T-Stage \* E\_O\_LOD

## Crosstab

|         |                  |                  | E_O_LOD  |          |        |
|---------|------------------|------------------|----------|----------|--------|
|         |                  |                  | Negative | Positive | Total  |
| T_Stage | 1                | Count            | 4        | 1        | 5      |
|         |                  | % within T_Stage | 80.0%    | 20.0%    | 100.0% |
|         | 2                | Count            | 4        | 6        | 10     |
|         |                  | % within T_Stage | 40.0%    | 60.0%    | 100.0% |
|         | 3                | Count            | 16       | 17       | 33     |
|         |                  | % within T_Stage | 48.5%    | 51.5%    | 100.0% |
|         | 4                | Count            | 29       | 32       | 61     |
|         |                  | % within T_Stage | 47.5%    | 52.5%    | 100.0% |
|         | 5                | Count            | 8        | 6        | 14     |
|         |                  | % within T_Stage | 57.1%    | 42.9%    | 100.0% |
| Total   | Count            | 61               | 62       | 123      |        |
|         | % within T_Stage | 49.6%            | 50.4%    | 100.0%   |        |

## Directional Measures

|                    |                         |                   | Value | Asymptotic Standard Error <sup>a</sup> | Approximate T <sup>b</sup> | Approximate Significance | Exact Significance |
|--------------------|-------------------------|-------------------|-------|----------------------------------------|----------------------------|--------------------------|--------------------|
| Nominal by Nominal | Lambda                  | Symmetric         | .041  | .034                                   | 1.153                      | .249                     |                    |
|                    |                         | T_Stage Dependent | .000  | .000                                   | . <sup>c</sup>             | . <sup>c</sup>           |                    |
|                    |                         | E_O_LOD Dependent | .082  | .068                                   | 1.153                      | .249                     |                    |
|                    | Goodman and Kruskal tau | T_Stage Dependent | .002  | .004                                   |                            | .881 <sup>d</sup>        | .849               |
|                    |                         | E_O_LOD Dependent | .022  | .023                                   |                            | .621 <sup>d</sup>        | .626               |
|                    |                         |                   |       |                                        |                            |                          |                    |

a. Not assuming the null hypothesis.

b. Using the asymptotic standard error assuming the null hypothesis.

c. Cannot be computed because the asymptotic standard error equals zero.

d. Based on chi-square approximation

# T-Stage \* BOTH\_LOD

## Crosstab

|         |                  |                  | BOTH_LOD |          |        |
|---------|------------------|------------------|----------|----------|--------|
|         |                  |                  | Negative | Positive | Total  |
| T_Stage | 1                | Count            | 5        | 0        | 5      |
|         |                  | % within T_Stage | 100.0%   | 0.0%     | 100.0% |
|         | 2                | Count            | 7        | 3        | 10     |
|         |                  | % within T_Stage | 70.0%    | 30.0%    | 100.0% |
|         | 3                | Count            | 26       | 7        | 33     |
|         |                  | % within T_Stage | 78.8%    | 21.2%    | 100.0% |
|         | 4                | Count            | 43       | 18       | 61     |
|         |                  | % within T_Stage | 70.5%    | 29.5%    | 100.0% |
|         | 5                | Count            | 8        | 6        | 14     |
|         |                  | % within T_Stage | 57.1%    | 42.9%    | 100.0% |
| Total   | Count            | 89               | 34       | 123      |        |
|         | % within T_Stage | 72.4%            | 27.6%    | 100.0%   |        |

## Directional Measures

|                    |                         |                    | Value | Asymptotic Standard Error <sup>a</sup> | Approximate T  | Approximate Significance | Exact Significance |
|--------------------|-------------------------|--------------------|-------|----------------------------------------|----------------|--------------------------|--------------------|
| Nominal by Nominal | Lambda                  | Symmetric          | .000  | .000                                   | . <sup>b</sup> | . <sup>b</sup>           |                    |
|                    |                         | T_Stage Dependent  | .000  | .000                                   | . <sup>b</sup> | . <sup>b</sup>           |                    |
|                    |                         | BOTH_LOD Dependent | .000  | .000                                   | . <sup>b</sup> | . <sup>b</sup>           |                    |
|                    | Goodman and Kruskal tau | T_Stage Dependent  | .006  | .007                                   |                | .558 <sup>c</sup>        | .519               |
|                    |                         | BOTH_LOD Dependent | .035  | .026                                   |                | .366 <sup>c</sup>        | .367               |
|                    |                         |                    |       |                                        |                |                          |                    |

a. Not assuming the null hypothesis.

b. Cannot be computed because the asymptotic standard error equals zero.

c. Based on chi-square approximation

# Nodal Status \* SDC\_NPY\_LOD\_D1

## Crosstab

|          |                   |                   | SDC_NPY_LOD_D1 |          |        |
|----------|-------------------|-------------------|----------------|----------|--------|
|          |                   |                   | Negative       | Positive | Total  |
| N_Status | Nodes negative    | Count             | 54             | 21       | 75     |
|          |                   | % within N_Status | 72.0%          | 28.0%    | 100.0% |
|          | Nodes positive    | Count             | 24             | 24       | 48     |
|          |                   | % within N_Status | 50.0%          | 50.0%    | 100.0% |
| Total    | Count             | 78                | 45             | 123      |        |
|          | % within N_Status | 63.4%             | 36.6%          | 100.0%   |        |

## Directional Measures

|                    |                         |                          | Value | Asymptotic Standard Error <sup>a</sup> | Approximate T <sup>b</sup> | Approximate Significance | Exact Significance |
|--------------------|-------------------------|--------------------------|-------|----------------------------------------|----------------------------|--------------------------|--------------------|
| Nominal by Nominal | Lambda                  | Symmetric                | .032  | .071                                   | .448                       | .654                     |                    |
|                    |                         | N_Status Dependent       | .063  | .135                                   | .448                       | .654                     |                    |
|                    |                         | SDC_NPY_LOD_D1 Dependent | .000  | .000                                   | . <sup>c</sup>             | . <sup>c</sup>           |                    |
|                    | Goodman and Kruskal tau | N_Status Dependent       | .050  | .040                                   |                            | .014 <sup>d</sup>        | .021               |
|                    |                         | SDC_NPY_LOD_D1 Dependent | .050  | .040                                   |                            | .014 <sup>d</sup>        | .021               |
|                    |                         |                          |       |                                        |                            |                          |                    |

a. Not assuming the null hypothesis.

b. Using the asymptotic standard error assuming the null hypothesis.

c. Cannot be computed because the asymptotic standard error equals zero.

d. Based on chi-square approximation

# Nodal Status \* IKZF\_SEPT9\_LOD\_D1

## Crosstab

|          |                   |                   | IKZF_SEPT9_LOD_D1 |          | Total  |
|----------|-------------------|-------------------|-------------------|----------|--------|
|          |                   |                   | Negative          | Positive |        |
| N_Status | Nodes negative    | Count             | 45                | 30       | 75     |
|          |                   | % within N_Status | 60.0%             | 40.0%    | 100.0% |
|          | Nodes positive    | Count             | 27                | 21       | 48     |
|          |                   | % within N_Status | 56.3%             | 43.8%    | 100.0% |
| Total    | Count             |                   | 72                | 51       | 123    |
|          | % within N_Status |                   | 58.5%             | 41.5%    | 100.0% |

## Directional Measures

|                    |                         |                             | Value | Asymptotic Standard Error <sup>a</sup> | Approximate T  | Approximate Significance | Exact Significance |
|--------------------|-------------------------|-----------------------------|-------|----------------------------------------|----------------|--------------------------|--------------------|
| Nominal by Nominal | Lambda                  | Symmetric                   | .000  | .000                                   | . <sup>b</sup> | . <sup>b</sup>           |                    |
|                    |                         | N_Status Dependent          | .000  | .000                                   | . <sup>b</sup> | . <sup>b</sup>           |                    |
|                    |                         | IKZF_SEPT9_LOD_D1 Dependent | .000  | .000                                   | . <sup>b</sup> | . <sup>b</sup>           |                    |
|                    | Goodman and Kruskal tau | N_Status Dependent          | .001  | .007                                   |                | .682 <sup>c</sup>        | .711               |
|                    |                         | IKZF_SEPT9_LOD_D1 Dependent | .001  | .007                                   |                | .682 <sup>c</sup>        | .711               |
|                    |                         |                             |       |                                        |                |                          |                    |

a. Not assuming the null hypothesis.

b. Cannot be computed because the asymptotic standard error equals zero.

c. Based on chi-square approximation

# Nodal Status \* MERGED\_LOD\_D1

## Crosstab

|          |                   |                   | MERGED_LOD_D1 |          | Total  |
|----------|-------------------|-------------------|---------------|----------|--------|
|          |                   |                   | Negative      | Positive |        |
| N_Status | Nodes negative    | Count             | 48            | 27       | 75     |
|          |                   | % within N_Status | 64.0%         | 36.0%    | 100.0% |
|          | Nodes positive    | Count             | 21            | 27       | 48     |
|          |                   | % within N_Status | 43.8%         | 56.3%    | 100.0% |
| Total    | Count             |                   | 69            | 54       | 123    |
|          | % within N_Status |                   | 56.1%         | 43.9%    | 100.0% |

## Directional Measures

|                    |                         |                         | Value | Asymptotic Standard Error <sup>a</sup> | Approximate T <sup>b</sup> | Approximate Significance | Exact Significance |
|--------------------|-------------------------|-------------------------|-------|----------------------------------------|----------------------------|--------------------------|--------------------|
| Nominal by Nominal | Lambda                  | Symmetric               | .059  | .066                                   | .869                       | .385                     |                    |
|                    |                         | N_Status Dependent      | .000  | .000                                   | . <sup>c</sup>             | . <sup>c</sup>           |                    |
|                    |                         | MERGED_LOD_D1 Dependent | .111  | .121                                   | .869                       | .385                     |                    |
|                    | Goodman and Kruskal tau | N_Status Dependent      | .040  | .035                                   |                            | .028 <sup>d</sup>        | .040               |
|                    |                         | MERGED_LOD_D1 Dependent | .040  | .035                                   |                            | .028 <sup>d</sup>        | .040               |
|                    |                         |                         |       |                                        |                            |                          |                    |

a. Not assuming the null hypothesis.

b. Using the asymptotic standard error assuming the null hypothesis.

c. Cannot be computed because the asymptotic standard error equals zero.

d. Based on chi-square approximation

# Nodal Status \* E\_O\_LOD

## Crosstab

|          |                   | E_O_LOD           |          | Total  |
|----------|-------------------|-------------------|----------|--------|
|          |                   | Negative          | Positive |        |
| N_Status | Nodes negative    | Count             | 41       | 34     |
|          |                   | % within N_Status | 54.7%    | 45.3%  |
|          | Nodes positive    | Count             | 20       | 28     |
|          |                   | % within N_Status | 41.7%    | 58.3%  |
| Total    | Count             | 61                | 62       | 123    |
|          | % within N_Status | 49.6%             | 50.4%    | 100.0% |

## Directional Measures

|                    |                         |                    | Value | Asymptotic Standard Error <sup>a</sup> | Approximate T <sup>b</sup> | Approximate Significance | Exact Significance |
|--------------------|-------------------------|--------------------|-------|----------------------------------------|----------------------------|--------------------------|--------------------|
| Nominal by Nominal | Lambda                  | Symmetric          | .064  | .077                                   | .810                       | .418                     |                    |
|                    |                         | N_Status Dependent | .000  | .000                                   | . <sup>c</sup>             | . <sup>c</sup>           |                    |
|                    |                         | E_O_LOD Dependent  | .115  | .134                                   | .810                       | .418                     |                    |
|                    | Goodman and Kruskal tau | N_Status Dependent | .016  | .023                                   |                            | .161 <sup>d</sup>        | .197               |
|                    |                         | E_O_LOD Dependent  | .016  | .023                                   |                            | .161 <sup>d</sup>        | .197               |
|                    |                         |                    |       |                                        |                            |                          |                    |

a. Not assuming the null hypothesis.

b. Using the asymptotic standard error assuming the null hypothesis.

c. Cannot be computed because the asymptotic standard error equals zero.

d. Based on chi-square approximation

# Nodal Status \* BOTH\_LOD

## Crosstab

|          |                   | BOTH_LOD          |          | Total  |
|----------|-------------------|-------------------|----------|--------|
|          |                   | Negative          | Positive |        |
| N_Status | Nodes negative    | Count             | 58       | 17     |
|          |                   | % within N_Status | 77.3%    | 22.7%  |
|          | Nodes positive    | Count             | 31       | 17     |
|          |                   | % within N_Status | 64.6%    | 35.4%  |
| Total    | Count             | 89                | 34       | 123    |
|          | % within N_Status | 72.4%             | 27.6%    | 100.0% |

## Directional Measures

|                    |                         |                    | Value | Asymptotic Standard Error <sup>a</sup> | Approximate T  | Approximate Significance | Exact Significance |
|--------------------|-------------------------|--------------------|-------|----------------------------------------|----------------|--------------------------|--------------------|
| Nominal by Nominal | Lambda                  | Symmetric          | .000  | .000                                   | . <sup>b</sup> | . <sup>b</sup>           |                    |
|                    |                         | N_Status Dependent | .000  | .000                                   | . <sup>b</sup> | . <sup>b</sup>           |                    |
|                    |                         | BOTH_LOD Dependent | .000  | .000                                   | . <sup>b</sup> | . <sup>b</sup>           |                    |
|                    | Goodman and Kruskal tau | N_Status Dependent | .019  | .025                                   |                | .125 <sup>c</sup>        | .150               |
|                    |                         | BOTH_LOD Dependent | .019  | .025                                   |                | .125 <sup>c</sup>        | .150               |
|                    |                         |                    |       |                                        |                |                          |                    |

a. Not assuming the null hypothesis.

b. Cannot be computed because the asymptotic standard error equals zero.

c. Based on chi-square approximation

LVI\_final \* SDC\_NPY\_LOD\_D1

**Crosstab**

|           |                    |                    | SDC_NPY_LOD_D1 |          | Total  |
|-----------|--------------------|--------------------|----------------|----------|--------|
|           |                    |                    | Negative       | Positive |        |
| LVI_final | 0                  | Count              | 58             | 26       | 84     |
|           |                    | % within LVI_final | 69.0%          | 31.0%    | 100.0% |
|           | 1                  | Count              | 20             | 19       | 39     |
|           |                    | % within LVI_final | 51.3%          | 48.7%    | 100.0% |
| Total     | Count              |                    | 78             | 45       | 123    |
|           | % within LVI_final |                    | 63.4%          | 36.6%    | 100.0% |

**Directional Measures**

|                    |                         |                          | Value | Asymptotic Standard Error <sup>a</sup> | Approximate T  | Approximate Significance | Exact Significance |
|--------------------|-------------------------|--------------------------|-------|----------------------------------------|----------------|--------------------------|--------------------|
| Nominal by Nominal | Lambda                  | Symmetric                | .000  | .000                                   | . <sup>b</sup> | . <sup>b</sup>           |                    |
|                    |                         | LVI_final Dependent      | .000  | .000                                   | . <sup>b</sup> | . <sup>b</sup>           |                    |
|                    |                         | SDC_NPY_LOD_D1 Dependent | .000  | .000                                   | . <sup>b</sup> | . <sup>b</sup>           |                    |
|                    | Goodman and Kruskal tau | LVI_final Dependent      | .029  | .031                                   |                | .058 <sup>c</sup>        | .071               |
|                    |                         | SDC_NPY_LOD_D1 Dependent | .029  | .031                                   |                | .058 <sup>c</sup>        | .071               |
|                    |                         |                          |       |                                        |                |                          |                    |

a. Not assuming the null hypothesis.

b. Cannot be computed because the asymptotic standard error equals zero.

c. Based on chi-square approximation

LVI\_final \* IKZF\_SEPT9\_LOD\_D1

**Crosstab**

|           |                    |                    | IKZF_SEPT9_LOD_D1 |          | Total  |
|-----------|--------------------|--------------------|-------------------|----------|--------|
|           |                    |                    | Negative          | Positive |        |
| LVI_final | 0                  | Count              | 50                | 34       | 84     |
|           |                    | % within LVI_final | 59.5%             | 40.5%    | 100.0% |
|           | 1                  | Count              | 22                | 17       | 39     |
|           |                    | % within LVI_final | 56.4%             | 43.6%    | 100.0% |
| Total     | Count              |                    | 72                | 51       | 123    |
|           | % within LVI_final |                    | 58.5%             | 41.5%    | 100.0% |

**Directional Measures**

|                    |                         |                             | Value | Asymptotic Standard Error <sup>a</sup> | Approximate T  | Approximate Significance | Exact Significance |
|--------------------|-------------------------|-----------------------------|-------|----------------------------------------|----------------|--------------------------|--------------------|
| Nominal by Nominal | Lambda                  | Symmetric                   | .000  | .000                                   | . <sup>b</sup> | . <sup>b</sup>           |                    |
|                    |                         | LVI_final Dependent         | .000  | .000                                   | . <sup>b</sup> | . <sup>b</sup>           |                    |
|                    |                         | IKZF_SEPT9_LOD_D1 Dependent | .000  | .000                                   | . <sup>b</sup> | . <sup>b</sup>           |                    |
|                    | Goodman and Kruskal tau | LVI_final Dependent         | .001  | .005                                   |                | .745 <sup>c</sup>        | .845               |
|                    |                         | IKZF_SEPT9_LOD_D1 Dependent | .001  | .005                                   |                | .745 <sup>c</sup>        | .845               |
|                    |                         |                             |       |                                        |                |                          |                    |

a. Not assuming the null hypothesis.

b. Cannot be computed because the asymptotic standard error equals zero.

c. Based on chi-square approximation

# LVI\_final \* MERGED\_LOD\_D1

## Crosstab

|           |                    |                    | MERGED_LOD_D1 |          | Total  |
|-----------|--------------------|--------------------|---------------|----------|--------|
|           |                    |                    | Negative      | Positive |        |
| LVI_final | 0                  | Count              | 52            | 32       | 84     |
|           |                    | % within LVI_final | 61.9%         | 38.1%    | 100.0% |
|           | 1                  | Count              | 17            | 22       | 39     |
|           |                    | % within LVI_final | 43.6%         | 56.4%    | 100.0% |
| Total     | Count              |                    | 69            | 54       | 123    |
|           | % within LVI_final |                    | 56.1%         | 43.9%    | 100.0% |

## Directional Measures

|                    |                         |                         | Value | Asymptotic Standard Error <sup>a</sup> | Approximate T <sup>b</sup> | Approximate Significance | Exact Significance |
|--------------------|-------------------------|-------------------------|-------|----------------------------------------|----------------------------|--------------------------|--------------------|
| Nominal by Nominal | Lambda                  | Symmetric               | .054  | .065                                   | .803                       | .422                     |                    |
|                    |                         | LVI_final Dependent     | .000  | .000                                   | .                          | .                        |                    |
|                    |                         | MERGED_LOD_D1 Dependent | .093  | .110                                   | .803                       | .422                     |                    |
|                    | Goodman and Kruskal tau | LVI_final Dependent     | .029  | .031                                   |                            | .058 <sup>d</sup>        | .079               |
|                    |                         | MERGED_LOD_D1 Dependent | .029  | .031                                   |                            | .058 <sup>d</sup>        | .079               |
|                    |                         |                         |       |                                        |                            |                          |                    |

- a. Not assuming the null hypothesis.  
b. Using the asymptotic standard error assuming the null hypothesis.  
c. Cannot be computed because the asymptotic standard error equals zero.  
d. Based on chi-square approximation

# LVI\_final \* E\_O\_LOD

## Crosstab

|           |                    |                    | E_O_LOD  |          | Total  |
|-----------|--------------------|--------------------|----------|----------|--------|
|           |                    |                    | Negative | Positive |        |
| LVI_final | 0                  | Count              | 44       | 40       | 84     |
|           |                    | % within LVI_final | 52.4%    | 47.6%    | 100.0% |
|           | 1                  | Count              | 17       | 22       | 39     |
|           |                    | % within LVI_final | 43.6%    | 56.4%    | 100.0% |
| Total     | Count              |                    | 61       | 62       | 123    |
|           | % within LVI_final |                    | 49.6%    | 50.4%    | 100.0% |

## Directional Measures

|                    |                         |                     | Value | Asymptotic Standard Error <sup>a</sup> | Approximate T <sup>b</sup> | Approximate Significance | Exact Significance |
|--------------------|-------------------------|---------------------|-------|----------------------------------------|----------------------------|--------------------------|--------------------|
| Nominal by Nominal | Lambda                  | Symmetric           | .040  | .090                                   | .437                       | .662                     |                    |
|                    |                         | LVI_final Dependent | .000  | .000                                   | .                          | .                        |                    |
|                    |                         | E_O_LOD Dependent   | .066  | .145                                   | .437                       | .662                     |                    |
|                    | Goodman and Kruskal tau | LVI_final Dependent | .007  | .015                                   |                            | .366 <sup>d</sup>        | .439               |
|                    |                         | E_O_LOD Dependent   | .007  | .015                                   |                            | .366 <sup>d</sup>        | .439               |
|                    |                         |                     |       |                                        |                            |                          |                    |

- a. Not assuming the null hypothesis.  
b. Using the asymptotic standard error assuming the null hypothesis.  
c. Cannot be computed because the asymptotic standard error equals zero.  
d. Based on chi-square approximation



LVI\_final \* BOTH\_LOD

**Crosstab**

|           |                    |                    | BOTH_LOD |          | Total  |
|-----------|--------------------|--------------------|----------|----------|--------|
|           |                    |                    | Negative | Positive |        |
| LVI_final | 0                  | Count              | 64       | 20       | 84     |
|           |                    | % within LVI_final | 76.2%    | 23.8%    | 100.0% |
|           | 1                  | Count              | 25       | 14       | 39     |
|           |                    | % within LVI_final | 64.1%    | 35.9%    | 100.0% |
| Total     | Count              |                    | 89       | 34       | 123    |
|           | % within LVI_final |                    | 72.4%    | 27.6%    | 100.0% |

**Directional Measures**

|                    |                         |                     | Value | Asymptotic Standard Error <sup>a</sup> | Approximate T  | Approximate Significance | Exact Significance |
|--------------------|-------------------------|---------------------|-------|----------------------------------------|----------------|--------------------------|--------------------|
| Nominal by Nominal | Lambda                  | Symmetric           | .000  | .000                                   | . <sup>b</sup> | . <sup>b</sup>           |                    |
|                    |                         | LVI_final Dependent | .000  | .000                                   | . <sup>b</sup> | . <sup>b</sup>           |                    |
|                    |                         | BOTH_LOD Dependent  | .000  | .000                                   | . <sup>b</sup> | . <sup>b</sup>           |                    |
|                    | Goodman and Kruskal tau | LVI_final Dependent | .016  | .023                                   |                | .165 <sup>c</sup>        | .195               |
|                    |                         | BOTH_LOD Dependent  | .016  | .023                                   |                | .165 <sup>c</sup>        | .195               |
|                    |                         |                     |       |                                        |                |                          |                    |

a. Not assuming the null hypothesis.

b. Cannot be computed because the asymptotic standard error equals zero.

c. Based on chi-square approximation

Lesion\_site\_cancer\_only \* SDC\_NPY\_LOD\_D1

**Crosstab**

|                        |                                 |                                 | SDC_NPY_LOD_D1 |          | Total  |
|------------------------|---------------------------------|---------------------------------|----------------|----------|--------|
|                        |                                 |                                 | Negative       | Positive |        |
| Lesion_site_canceronly | 1                               | Count                           | 49             | 24       | 73     |
|                        |                                 | % within Lesion_site_canceronly | 67.1%          | 32.9%    | 100.0% |
|                        | 2                               | Count                           | 29             | 20       | 49     |
|                        |                                 | % within Lesion_site_canceronly | 59.2%          | 40.8%    | 100.0% |
|                        | 3                               | Count                           | 0              | 1        | 1      |
|                        |                                 | % within Lesion_site_canceronly | 0.0%           | 100.0%   | 100.0% |
| Total                  | Count                           |                                 | 78             | 45       | 123    |
|                        | % within Lesion_site_canceronly |                                 | 63.4%          | 36.6%    | 100.0% |

**Directional Measures**

|                    |                         |                                  | Value | Asymptotic Standard Error <sup>a</sup> | Approximate T <sup>b</sup> | Approximate Significance | Exact Significance |
|--------------------|-------------------------|----------------------------------|-------|----------------------------------------|----------------------------|--------------------------|--------------------|
| Nominal by Nominal | Lambda                  | Symmetric                        | .011  | .010                                   | 1.004                      | .315                     |                    |
|                    |                         | Lesion_site_canceronly Dependent | .000  | .000                                   | . <sup>c</sup>             | . <sup>c</sup>           |                    |
|                    |                         | SDC_NPY_LOD_D1 Dependent         | .022  | .022                                   | 1.004                      | .315                     |                    |
|                    | Goodman and Kruskal tau | Lesion_site_canceronly Dependent | .007  | .015                                   |                            | .425 <sup>d</sup>        | .377               |
|                    |                         | SDC_NPY_LOD_D1 Dependent         | .021  | .015                                   |                            | .283 <sup>d</sup>        | .276               |
|                    |                         |                                  |       |                                        |                            |                          |                    |

a. Not assuming the null hypothesis.

b. Using the asymptotic standard error assuming the null hypothesis.

c. Cannot be computed because the asymptotic standard error equals zero.

d. Based on chi-square approximation

Lesion\_site\_cancer\_only \* IKZF\_SEPT9\_LOD\_D1

**Crosstab**

|                        |                                 |                                 | IKZF_SEPT9_LOD_D1 |          |        |
|------------------------|---------------------------------|---------------------------------|-------------------|----------|--------|
|                        |                                 |                                 | Negative          | Positive | Total  |
| Lesion_site_canceronly | 1                               | Count                           | 45                | 28       | 73     |
|                        |                                 | % within Lesion_site_canceronly | 61.6%             | 38.4%    | 100.0% |
|                        | 2                               | Count                           | 27                | 22       | 49     |
|                        |                                 | % within Lesion_site_canceronly | 55.1%             | 44.9%    | 100.0% |
|                        | 3                               | Count                           | 0                 | 1        | 1      |
|                        |                                 | % within Lesion_site_canceronly | 0.0%              | 100.0%   | 100.0% |
| Total                  | Count                           | 72                              | 51                | 123      |        |
|                        | % within Lesion_site_canceronly | 58.5%                           | 41.5%             | 100.0%   |        |

**Directional Measures**

|                    |                         |                                  | Value | Asymptotic Standard Error <sup>a</sup> | Approximate T <sup>b</sup> | Approximate Significance | Exact Significance |
|--------------------|-------------------------|----------------------------------|-------|----------------------------------------|----------------------------|--------------------------|--------------------|
| Nominal by Nominal | Lambda                  | Symmetric                        | .010  | .010                                   | 1.004                      | .315                     |                    |
|                    |                         | Lesion_site_canceronly Dependent | .000  | .000                                   | . <sup>c</sup>             | . <sup>c</sup>           |                    |
|                    |                         | IKZF_SEPT9_LOD_D1 Dependent      | .020  | .019                                   | 1.004                      | .315                     |                    |
|                    | Goodman and Kruskal tau | Lesion_site_canceronly Dependent | .005  | .012                                   |                            | .568 <sup>d</sup>        | .504               |
|                    |                         | IKZF_SEPT9_LOD_D1 Dependent      | .016  | .012                                   |                            | .382 <sup>d</sup>        | .391               |
|                    |                         |                                  |       |                                        |                            |                          |                    |

a. Not assuming the null hypothesis.

b. Using the asymptotic standard error assuming the null hypothesis.

c. Cannot be computed because the asymptotic standard error equals zero.

d. Based on chi-square approximation

Lesion\_site\_cancer\_only \* MERGED\_LOD\_D1

**Crosstab**

|                        |                                 |                                 | MERGED_LOD_D1 |          |        |
|------------------------|---------------------------------|---------------------------------|---------------|----------|--------|
|                        |                                 |                                 | Negative      | Positive | Total  |
| Lesion_site_canceronly | 1                               | Count                           | 45            | 28       | 73     |
|                        |                                 | % within Lesion_site_canceronly | 61.6%         | 38.4%    | 100.0% |
|                        | 2                               | Count                           | 24            | 25       | 49     |
|                        |                                 | % within Lesion_site_canceronly | 49.0%         | 51.0%    | 100.0% |
|                        | 3                               | Count                           | 0             | 1        | 1      |
|                        |                                 | % within Lesion_site_canceronly | 0.0%          | 100.0%   | 100.0% |
| Total                  | Count                           | 69                              | 54            | 123      |        |
|                        | % within Lesion_site_canceronly | 56.1%                           | 43.9%         | 100.0%   |        |

**Directional Measures**

|                    |                         |                                  | Value | Asymptotic Standard Error <sup>a</sup> | Approximate T <sup>b</sup> | Approximate Significance | Exact Significance |
|--------------------|-------------------------|----------------------------------|-------|----------------------------------------|----------------------------|--------------------------|--------------------|
| Nominal by Nominal | Lambda                  | Symmetric                        | .019  | .067                                   | .283                       | .777                     |                    |
|                    |                         | Lesion_site_canceronly Dependent | .000  | .000                                   | . <sup>c</sup>             | . <sup>c</sup>           |                    |
|                    |                         | MERGED_LOD_D1 Dependent          | .037  | .128                                   | .283                       | .777                     |                    |
|                    | Goodman and Kruskal tau | Lesion_site_canceronly Dependent | .016  | .022                                   |                            | .145 <sup>d</sup>        | .162               |
|                    |                         | MERGED_LOD_D1 Dependent          | .026  | .022                                   |                            | .205 <sup>d</sup>        | .162               |
|                    |                         |                                  |       |                                        |                            |                          |                    |

a. Not assuming the null hypothesis.

b. Using the asymptotic standard error assuming the null hypothesis.

c. Cannot be computed because the asymptotic standard error equals zero.

d. Based on chi-square approximation

Lesion\_site\_cancer\_only \* E\_O\_LOD

**Crosstab**

|                        |                                 |                                 | E_O_LOD  |          |        |
|------------------------|---------------------------------|---------------------------------|----------|----------|--------|
|                        |                                 |                                 | Negative | Positive | Total  |
| Lesion_site_canceronly | 1                               | Count                           | 39       | 34       | 73     |
|                        |                                 | % within Lesion_site_canceronly | 53.4%    | 46.6%    | 100.0% |
|                        | 2                               | Count                           | 22       | 27       | 49     |
|                        |                                 | % within Lesion_site_canceronly | 44.9%    | 55.1%    | 100.0% |
|                        | 3                               | Count                           | 0        | 1        | 1      |
|                        |                                 | % within Lesion_site_canceronly | 0.0%     | 100.0%   | 100.0% |
| Total                  | Count                           | 61                              | 62       | 123      |        |
|                        | % within Lesion_site_canceronly | 49.6%                           | 50.4%    | 100.0%   |        |

**Directional Measures**

|                    |                         |                                  | Value | Asymptotic Standard Error <sup>a</sup> | Approximate T <sup>b</sup> | Approximate Significance | Exact Significance |
|--------------------|-------------------------|----------------------------------|-------|----------------------------------------|----------------------------|--------------------------|--------------------|
| Nominal by Nominal | Lambda                  | Symmetric                        | .045  | .075                                   | .586                       | .558                     |                    |
|                    |                         | Lesion_site_canceronly Dependent | .000  | .000                                   | . <sup>c</sup>             | . <sup>c</sup>           |                    |
|                    |                         | E_O_LOD Dependent                | .082  | .134                                   | .586                       | .558                     |                    |
|                    | Goodman and Kruskal tau | Lesion_site_canceronly Dependent | .007  | .015                                   |                            | .414 <sup>d</sup>        | .360               |
|                    |                         | E_O_LOD Dependent                | .015  | .015                                   |                            | .401 <sup>d</sup>        | .409               |
|                    |                         |                                  |       |                                        |                            |                          |                    |

a. Not assuming the null hypothesis.

b. Using the asymptotic standard error assuming the null hypothesis.

c. Cannot be computed because the asymptotic standard error equals zero.

d. Based on chi-square approximation

Lesion\_site\_cancer\_only \* BOTH\_LOD

**Crosstab**

|                        |                                 |                                 | BOTH_LOD |          |        |
|------------------------|---------------------------------|---------------------------------|----------|----------|--------|
|                        |                                 |                                 | Negative | Positive | Total  |
| Lesion_site_canceronly | 1                               | Count                           | 55       | 18       | 73     |
|                        |                                 | % within Lesion_site_canceronly | 75.3%    | 24.7%    | 100.0% |
|                        | 2                               | Count                           | 34       | 15       | 49     |
|                        |                                 | % within Lesion_site_canceronly | 69.4%    | 30.6%    | 100.0% |
|                        | 3                               | Count                           | 0        | 1        | 1      |
|                        |                                 | % within Lesion_site_canceronly | 0.0%     | 100.0%   | 100.0% |
| Total                  | Count                           | 89                              | 34       | 123      |        |
|                        | % within Lesion_site_canceronly | 72.4%                           | 27.6%    | 100.0%   |        |

**Directional Measures**

|                    |                         |                                  | Value | Asymptotic Standard Error <sup>a</sup> | Approximate T <sup>b</sup> | Approximate Significance | Exact Significance |
|--------------------|-------------------------|----------------------------------|-------|----------------------------------------|----------------------------|--------------------------|--------------------|
| Nominal by Nominal | Lambda                  | Symmetric                        | .012  | .012                                   | 1.004                      | .315                     |                    |
|                    |                         | Lesion_site_canceronly Dependent | .000  | .000                                   | . <sup>c</sup>             | . <sup>c</sup>           |                    |
|                    |                         | BOTH_LOD Dependent               | .029  | .029                                   | 1.004                      | .315                     |                    |
|                    | Goodman and Kruskal tau | Lesion_site_canceronly Dependent | .005  | .012                                   |                            | .544 <sup>d</sup>        | .445               |
|                    |                         | BOTH_LOD Dependent               | .026  | .012                                   |                            | .209 <sup>d</sup>        | .220               |
|                    |                         |                                  |       |                                        |                            |                          |                    |

a. Not assuming the null hypothesis.

b. Using the asymptotic standard error assuming the null hypothesis.

c. Cannot be computed because the asymptotic standard error equals zero.

d. Based on chi-square approximation
